# Supplementary material for: Resistance to Inhibitors of Cholinesterase 3 (Ric-3) Expression Promotes Selective Protein Associations with the Human α7-Nicotinic Acetylcholine Receptor Interactome
Source: PLoS One. 2015 Aug 10;10(8):e0134409. doi: 10.1371/journal.pone.0134409 (PMC4530945; doi:10.1371/journal.pone.0134409)
Supplement: S3 Table — 625 identified proteins meeting the established inclusion criteria were identified in both SH-EP1-hα7-Ric-3 and SH-EP1-hα7 samples. These proteins represent both possible α7-nAChR interactions regardless of Ric-3 expression as well as non-specific binding to α-bgtx-affinity beads. Further investigation is required to distinguish which identifications are non-specific. Data analysis was performed using ProteoIQ version 2.7 Protein inclusion criteria include 1% protein FDR, minimum peptide length of six amino acids ≥90% probability, identification in 2 or more of 5 replicates, and 0% probability in controls. FDRs were determined using the PROVALT algorithm and probabilities were determined with the ProteinProphet algorithm through ProteoIQ analysis. Only Top and Co-Top identifications were considered. (XLSX) [file pone.0134409.s004.xlsx]

## Sheet: S3 Table
				SH-EP1-hα7-Ric-3					SH-EP1-hα7
	Protein name	Accession number		Total Peptides	Sequence coverage (%)	Data sets	Probability score (%)		Total Peptides	Sequence coverage (%)	Data sets	Probability score (%)
	14-3-3 protein gamma	P61981		7	30.77	5	100		2	11.74	4	95
	14-3-3 protein theta	P27348		10	46.12	5	100		5	26.12	5	100
	14-3-3 protein zeta/delta	P63104		9	44.08	5	100		6	33.47	5	100
	182 kDa tankyrase-1-binding protein	Q9C0C2		14	10.82	5	100		22	17.99	5	100
	26S protease regulatory subunit 4	P62191		5	15.68	3	100		2	5	2	98
	26S protease regulatory subunit 7	P35998		6	18.48	5	100		3	9.01	4	100
	26S protease regulatory subunit 8	P62195		3	10.34	5	100		4	12.07	5	100
	26S proteasome non-ATPase regulatory subunit 2	Q13200		9	15.42	5	100		6	8.15	4	100
	28S ribosomal protein S2, mitochondrial	Q9Y399		3	9.8	5	93		5	14.19	5	97
	28S ribosomal protein S22, mitochondrial	P82650		8	29.44	5	100		9	31.67	4	100
	28S ribosomal protein S26, mitochondrial	Q9BYN8		3	19.02	3	98		2	13.66	4	97
	28S ribosomal protein S27, mitochondrial	Q92552		6	19.57	5	100		8	25.36	3	100
	28S ribosomal protein S29, mitochondrial	P51398		6	20.85	4	100		6	19.35	5	100
	28S ribosomal protein S5, mitochondrial	P82675		4	11.63	2	100		3	10	3	100
	28S ribosomal protein S9, mitochondrial	P82933		3	9.09	2	100		4	13.64	3	100
	39S ribosomal protein L24, mitochondrial	Q96A35		2	10.65	2	93		2	10.65	3	94
	39S ribosomal protein L4, mitochondrial	Q9BYD3		5	24.12	4	100		4	20.26	4	98
	39S ribosomal protein L50, mitochondrial	Q8N5N7		2	19.62	2	100		1	12.66	2	99
	40S ribosomal protein S10	P46783		6	32.73	5	100		7	38.18	5	100
	40S ribosomal protein S11	P62280		7	27.85	5	100		6	26.58	5	98
	40S ribosomal protein S13	P62277		6	34.44	5	100		8	45.03	5	100
	40S ribosomal protein S14	P62263		6	37.75	5	100		6	37.75	5	100
	40S ribosomal protein S15	P62841		3	22.07	3	99		4	37.24	3	100
	40S ribosomal protein S15a	P62244		6	51.54	5	100		6	51.54	5	100
	40S ribosomal protein S16	P62249		10	55.48	5	100		9	54.11	5	100
	40S ribosomal protein S18	P62269		6	30.92	5	100		9	47.37	5	100
	40S ribosomal protein S19	P39019		7	40.69	5	100		9	42.07	5	100
	40S ribosomal protein S2	P15880		9	31.4	5	100		11	37.88	5	100
	40S ribosomal protein S20	P60866		2	19.33	5	95		3	22.69	5	100
	40S ribosomal protein S21	P63220		1	12.05	2	95		1	12.05	4	100
	40S ribosomal protein S23	P62266		2	16.08	4	97		4	21.68	5	98
	40S ribosomal protein S25	P62851		4	29.6	5	96		4	29.6	5	100
	40S ribosomal protein S26	P62854		3	33.91	5	97		3	33.91	5	97
	40S ribosomal protein S28	P62857		2	30.43	5	96		2	30.43	5	100
	40S ribosomal protein S3	P23396		13	59.26	5	100		15	62.96	5	100
	40S ribosomal protein S3a	P61247		13	48.86	5	100		16	53.79	5	100
	40S ribosomal protein S4, X isoform	P62701		11	40.3	5	100		11	40.3	5	100
	40S ribosomal protein S5	P46782		2	14.22	4	99		5	23.53	5	100
	40S ribosomal protein S6	P62753		5	20.88	5	100		6	21.29	5	100
	40S ribosomal protein S7	P62081		7	36.08	5	100		7	36.08	5	100
	40S ribosomal protein S8	P62241		7	37.98	5	100		9	38.94	5	100
	40S ribosomal protein S9	P46781		16	57.73	5	100		16	56.7	5	100
	40S ribosomal protein SA	P08865		7	26.78	5	100		7	31.53	5	100
	60 kDa heat shock protein, mitochondrial	P10809		9	21.99	5	100		5	13.26	5	100
	60S acidic ribosomal protein P0	P05388		10	41.96	5	100		10	41.96	5	100
	60S acidic ribosomal protein P2	P05387		6	84.35	5	100		7	85.22	5	100
	60S ribosomal export protein NMD3	Q96D46		2	4.97	2	96		3	10.14	2	99
	60S ribosomal protein L10a	P62906		6	28.57	5	100		9	41.47	5	100
	60S ribosomal protein L12	P30050		3	24.24	5	99		3	24.24	5	100
	60S ribosomal protein L13	P26373		5	24.17	5	100		8	32.7	5	100
	60S ribosomal protein L13a	P40429		5	22.17	5	95		5	21.67	5	93
	60S ribosomal protein L15	P61313		9	42.16	5	100		9	42.16	5	100
	60S ribosomal protein L17	P18621		5	31.52	5	100		7	36.96	5	100
	60S ribosomal protein L18	Q07020		7	36.7	5	100		6	29.26	5	100
	60S ribosomal protein L19	P84098		5	18.37	5	100		6	22.96	5	100
	60S ribosomal protein L21	P46778		5	31.88	5	99		7	38.12	5	100
	60S ribosomal protein L22	P35268		3	30.47	5	99		3	30.47	5	99
	60S ribosomal protein L22-like 1	Q6P5R6		2	29.51	5	99		3	39.34	4	100
	60S ribosomal protein L23	P62829		3	30.71	5	94		3	30.71	5	99
	60S ribosomal protein L23a	P62750		6	32.69	5	98		6	32.69	5	100
	60S ribosomal protein L24	P83731		6	29.3	5	100		6	29.3	5	100
	60S ribosomal protein L26	P61254		7	29.66	5	92		8	35.17	5	98
	60S ribosomal protein L27	P61353		4	36.03	5	100		5	42.65	5	100
	60S ribosomal protein L27a	P46776		2	14.19	5	99		3	19.59	5	99
	60S ribosomal protein L28	P46779		2	16.06	5	92		3	21.9	5	93
	60S ribosomal protein L29	P47914		2	14.47	5	94		2	14.47	4	94
	60S ribosomal protein L3	P39023		8	29.28	5	100		8	24.81	5	100
	60S ribosomal protein L31	P62899		5	39.2	5	99		7	48	5	100
	60S ribosomal protein L36	Q9Y3U8		4	20.95	5	99		3	20.95	5	99
	60S ribosomal protein L37a	P61513		1	19.57	3	99		1	19.57	2	93
	60S ribosomal protein L38	P63173		6	50	5	100		6	50	5	100
	60S ribosomal protein L4	P36578		12	29.27	5	100		11	27.17	5	100
	60S ribosomal protein L5	P46777		6	18.86	5	100		6	20.54	5	100
	60S ribosomal protein L6	Q02878		9	34.03	5	100		12	37.85	5	100
	60S ribosomal protein L7	P18124		12	40.73	5	100		10	40.32	5	100
	60S ribosomal protein L7a	P62424		11	33.08	5	100		10	30.08	5	100
	60S ribosomal protein L8	P62917		6	22.18	5	99		8	28.4	5	100
	60S ribosomal protein L9	P32969		5	36.98	5	100		5	36.98	5	100
	78 kDa glucose-regulated protein	P11021		33	52.45	5	100		31	53.06	5	100
	7SK snRNA methylphosphate capping enzyme	Q7L2J0		1	2.76	2	98		1	2.76	4	98
	Absent in melanoma 1 protein	Q9Y4K1		14	12.48	3	100		8	7.31	4	100
	Actin-like protein 6A	O96019		14	42.19	5	100		14	42.19	5	100
	Activated RNA polymerase II transcriptional coactivator p15	P53999		5	37.8	5	100		5	37.8	5	100
	Activating signal cointegrator 1 complex subunit 2	Q9H1I8		7	15.85	5	100		9	19.55	5	100
	Activating signal cointegrator 1 complex subunit 3	Q8N3C0		18	9.9	5	100		15	8.45	5	100
	Adenosylhomocysteinase	P23526		8	23.84	5	100		9	26.85	5	100
	A-kinase anchor protein 1, mitochondrial	Q92667		4	7.53	3	100		4	6.09	4	100
	A-kinase anchor protein 8	O43823		5	12.72	5	100		9	20.38	5	100
	A-kinase anchor protein 8-like	Q9ULX6		5	9.6	4	100		6	10.37	4	100
	Aldehyde dehydrogenase family 16 member A1	Q8IZ83		2	3.99	3	99		4	7.48	5	100
	28S ribosomal protein S29, mitochondrial	O43707		10	14.71	3	100		3	4.94	3	98
	Ashwin	Q9BVC5		2	11.21	3	97		2	11.21	2	99
	Aspartyl/asparaginyl beta-hydroxylase	Q12797		2	4.49	4	97		3	7.92	2	92
	Aspartyl-tRNA synthetase, cytoplasmic	P14868		7	17.96	5	94		7	18.16	5	93
	Ataxin-2-like protein	Q8WWM7		27	29.3	5	100		32	33.3	5	100
	ATP-dependent RNA helicase A	Q08211		35	34.25	5	100		40	40.71	5	100
	ATP-dependent RNA helicase DDX1	Q92499		27	44.32	5	100		27	44.19	5	100
	ATP-dependent RNA helicase DDX3X	O00571		32	47.89	5	100		34	51.96	5	100
	AT-rich interactive domain-containing protein 1A	O14497		45	29.63	5	100		52	34.62	5	100
	BAG family molecular chaperone regulator 2	O95816		2	9.48	4	99		4	21.8	5	100
	BAG family molecular chaperone regulator 4	O95429		12	49.89	5	100		14	51.64	5	100
	Basement membrane-specific heparan sulfate proteoglycan core protein	P98160		30	9.63	5	100		13	4.21	5	100
	B-cell CLL/lymphoma 7 protein family member C	Q8WUZ0		4	21.66	4	95		6	41.94	5	100
	Beta-actin-like protein 2	Q562R1		7	21.54	5	99		7	21.54	5	100
	Bifunctional aminoacyl-tRNA synthetase	P07814		14	12.63	5	100		11	9.26	5	100
	CAD protein	P27708		53	31.24	5	100		64	42.83	5	100
	Calponin-2	Q99439		3	13.27	5	99		5	19.42	5	100
	Calumenin	O43852		5	25.71	5	100		3	14.6	5	100
	Caprin-1	Q14444		13	30.47	5	100		17	43.44	5	100
	Casein kinase I isoform alpha	P48729		2	9.79	5	99		5	19.88	5	99
	Catenin beta-1	P35222		3	4.1	4	96		10	19.33	5	100
	CCR4-NOT transcription complex subunit 3	O75175		4	6.24	3	100		8	10.89	3	99
	CCR4-NOT transcription complex subunit 7	Q9UIV1		5	25.96	2	99		5	25.96	5	100
	CDKN2A-interacting protein	Q9NXV6		9	20.69	5	100		11	27.76	5	100
	Cleavage and polyadenylation specificity factor subunit 5	O43809		6	29.96	5	100		5	30.84	4	100
	Coatomer subunit beta	P53618		2	2.62	3	100		2	2.62	2	93
	Cold-inducible RNA-binding protein	Q14011		5	38.37	5	100		4	31.98	5	100
	Collagen alpha-1(I) chain	P02452		5	4.64	4	99		4	3.35	3	98
	Collapsin response mediator protein 4 long variant	B3SXQ8		18	38.45	5	100		19	39.33	5	100
	Complement component 1 Q subcomponent-binding protein, mitochondrial	Q07021		3	12.06	5	98		4	16.67	3	99
	Constitutive coactivator of peroxisome proliferator-activated receptor gamma	Q96EK7		12	15.16	5	100		14	18.13	5	100
	Constitutive coactivator of PPAR-gamma-like protein 1	Q9NZB2		29	36.05	5	100		31	36.85	5	100
	CREB-binding protein	Q92793		4	2.38	5	90		8	4.3	5	100
	Cysteine and glycine-rich protein 1	P21291		2	16.58	4	100		2	16.58	2	99
	Cytoplasmic dynein 1 heavy chain 1	Q14204		3	0.67	2	93		7	2.35	5	100
	Cytoskeleton-associated protein 4	Q07065		27	47.34	5	100		19	36.05	5	100
	Cytospin-A	Q69YQ0		13	14.86	3	100		11	12.53	3	100
	DAZ-associated protein 1	Q96EP5		4	14.5	5	100		4	14.5	5	100
	DDB1- and CUL4-associated factor 7	P61962		3	10.53	4	97		3	10.53	5	100
	Deoxynucleotidyltransferase terminal-interacting protein 1	Q9H147		6	18.54	4	98		6	26.75	5	99
	Desmoplakin	P15924		17	6.65	3	100		38	15.88	5	100
	Developmentally-regulated GTP-binding protein 1	Q9Y295		3	11.44	4	100		3	11.44	3	100
	DNA (cytosine-5)-methyltransferase 1	P26358		4	3.59	4	99		5	3.65	2	100
	DNA replication licensing factor MCM5	P33992		10	17.17	5	100		12	20.44	5	100
	DNA replication licensing factor MCM7	P33993		15	28.23	5	100		21	40.06	5	100
	DNA-directed RNA polymerase II subunit RPB1	P24928		13	8.78	4	100		18	14.16	5	100
	DNA-directed RNA polymerase II subunit RPB2	P30876		7	7.84	4	100		16	17.46	4	100
	NA-directed RNA polymerases I, II, and III subunit RPABC1	P19388		4	19.05	3	92		4	22.86	5	99
	DNA-directed RNA polymerases I, II, and III subunit RPABC3	P52434		2	19.33	4	99		2	19.33	5	100
	DnaJ homolog subfamily A member 2	O60884		4	14.81	4	97		4	19.42	4	100
	DnaJ homolog subfamily A member 3, mitochondrial	Q96EY1		3	9.17	4	99		6	14.38	4	100
	DnaJ homolog subfamily C member 10	Q8IXB1		20	32.16	5	100		16	24.59	5	100
	Dystonin	Q03001		37	6.47	5	100		11	1.92	5	90
	E3 ubiquitin/ISG15 ligase TRIM25	Q14258		13	23.49	5	100		16	26.51	5	100
	E3 ubiquitin-protein ligase TRIM32	Q13049		3	7.66	3	100		6	12.1	4	100
	E3 ubiquitin-protein ligase TRIM56	Q9BRZ2		4	7.81	5	100		5	9.14	5	100
	ELAV-like protein 1	Q15717		11	44.17	5	100		10	40.8	5	100
	Elongation factor 1-beta	P24534		2	10.67	4	96		1	6.67	2	98
	Elongation factor 2	P13639		21	25.52	5	100		20	26.69	5	100
	Elongation factor Tu, mitochondrial	P49411		12	30.09	5	100		12	28.98	5	100
	EMILIN-1	Q9Y6C2		10	15.55	5	100		9	14.47	5	100
	Endoplasmin	P14625		29	37.11	5	100		10	14.57	5	100
	Epidermal growth factor receptor substrate 15-like 1	Q9UBC2		3	4.05	2	93		3	5.21	2	94
	Eukaryotic initiation factor 4A-I	P60842		9	28.82	5	100		9	28.57	4	99
	Eukaryotic initiation factor 4A-III	P38919		16	46.72	5	100		16	43.8	5	100
	Eukaryotic translation initiation factor 2 subunit 1	P05198		3	12.38	3	98		7	26.67	4	100
	Eukaryotic translation initiation factor 2 subunit 2	P20042		3	14.11	2	99		2	9.61	3	100
	Eukaryotic translation initiation factor 2A	Q9BY44		10	24.62	5	100		16	35.73	5	100
	Eukaryotic translation initiation factor 3 subunit A	Q14152		28	22.14	5	100		33	27.5	5	100
	Eukaryotic translation initiation factor 3 subunit C	Q99613		17	23.22	5	100		20	26.18	5	100
	Eukaryotic translation initiation factor 3 subunit D	O15371		7	19.71	4	100		5	15.88	3	100
	Eukaryotic translation initiation factor 3 subunit E	P60228		9	21.8	5	100		14	35.28	4	100
	Eukaryotic translation initiation factor 3 subunit F	O00303		5	18.77	5	100		7	25.21	5	100
	Eukaryotic translation initiation factor 3 subunit G	O75821		4	16.88	5	99		6	24.69	5	99
	Eukaryotic translation initiation factor 3 subunit H	O15372		3	11.36	4	99		4	10.51	5	100
	Eukaryotic translation initiation factor 3 subunit I	Q13347		6	21.85	5	100		6	21.85	5	100
	Eukaryotic translation initiation factor 3 subunit M	Q7L2H7		5	23.26	4	100		8	31.02	4	100
	Eukaryotic translation initiation factor 4 gamma 3	O43432		12	8.83	5	100		11	8.33	5	100
	Eukaryotic translation initiation factor 4 gamma, 3	B1AN89		2	4.44	3	98		1	2.86	3	98
	Eukaryotic translation initiation factor 4E type 2	O60573		1	8.98	4	97		2	13.06	3	95
	Eukaryotic translation initiation factor 5B	O60841		4	4.02	5	100		3	2.46	5	100
	F-actin-capping protein subunit alpha-1	P52907		5	29.02	5	100		5	23.43	5	100
	Far upstream element-binding protein 2	Q92945		20	39.38	5	100		27	49.23	5	100
	Far upstream element-binding protein 3	Q96I24		18	49.83	5	100		21	52.45	5	100
	Fatty acid synthase	P49327		46	25.93	5	100		49	27.72	5	100
	F-box-like/WD repeat-containing protein TBL1XR1	Q9BZK7		9	22.96	5	100		12	33.46	5	100
	Ferritin heavy chain	P02794		5	27.87	4	99		2	10.93	3	97
	Fibronectin type III domain-containing protein 3B	Q53EP0		5	6.48	5	100		5	6.31	5	100
	Filaggrin	P20930		8	3.6	2	100		3	0.84	2	100
	Filaggrin-2	Q5D862		7	5.86	5	100		3	2.34	4	100
	Fragile X mental retardation syndrome-related protein 1	P51114		26	47.18	5	100		26	51.69	5	100
	Fragile X mental retardation syndrome-related protein 2	P51116		12	26.89	5	100		10	19.02	5	100
	Galectin-1	P09382		3	25.19	5	100		4	31.11	5	100
	Galectin-3	P17931		6	28.4	5	100		7	31.2	5	100
	Galectin-3-binding protein	Q08380		15	29.06	5	100		18	34.19	5	100
	Gem-associated protein 5	Q8TEQ6		20	18.17	5	100		25	21.62	5	100
	Glutaminyl-tRNA synthetase	P47897		8	12.26	3	94		13	20.39	5	100
	Guanine nucleotide-binding protein subunit beta-2-like 1	P63244		6	17.98	4	100		6	17.98	5	95
	Heat shock 70 kDa protein 1A/1B	P08107		20	44.46	5	100		24	49.61	5	100
	Heat shock 70 kDa protein 1-like	P34931		12	25.59	5	97		13	26.68	5	98
	Heat shock 70 kDa protein 4	P34932		1	1.67	3	98		9	16.9	4	100
	Heat shock cognate 71 kDa protein	P11142		29	53.87	5	100		32	59.13	5	100
	Heat shock protein 75 kDa, mitochondrial	Q12931		1	1.99	2	98		2	3.69	2	99
	Heat shock protein beta-1	P04792		8	58.54	5	100		4	24.88	5	100
	Heat shock protein HSP 90-beta	P08238		24	32.6	5	100		13	21.13	5	100
	Heterogeneous nuclear ribonucleoprotein A0	Q13151		4	20.98	5	100		5	22.3	5	100
	Heterogeneous nuclear ribonucleoprotein A3	P51991		13	30.16	5	100		14	30.42	5	100
	Heterogeneous nuclear ribonucleoprotein D-like	O14979		6	14.29	5	100		8	19.05	5	100
	Heterogeneous nuclear ribonucleoprotein F	P52597		13	48.92	5	100		13	48.92	5	100
	Heterogeneous nuclear ribonucleoprotein G	P38159		11	26.85	5	100		15	37.85	5	100
	Heterogeneous nuclear ribonucleoprotein G-like 1	Q96E39		8	19.49	5	94		13	33.33	5	99
	Heterogeneous nuclear ribonucleoprotein H	P31943		14	48.55	5	100		14	48.55	5	100
	Heterogeneous nuclear ribonucleoprotein H2	P55795		9	29.18	5	100		11	39.2	5	100
	Heterogeneous nuclear ribonucleoprotein H3	P31942		12	51.16	5	100		13	60.4	5	100
	Heterogeneous nuclear ribonucleoprotein L	P14866		10	29.71	5	100		12	31.75	5	100
	Heterogeneous nuclear ribonucleoprotein R	O60506		17	32.91	5	100		24	43.18	5	100
	Heterogeneous nuclear ribonucleoprotein R	O43390		18	33.97	5	100		19	37.12	5	100
	Heterogeneous nuclear ribonucleoprotein	Q00839		20	27.52	5	100		19	25.58	5	100
	Heterogeneous nuclear ribonucleoprotein U-like protein 2	Q1KMD3		2	3.75	3	97		6	10.44	4	100
	Heterogeneous nuclear ribonucleoproteins A2/B1	P22626		18	55.81	5	100		19	70.25	5	100
	Histone acetyltransferase p300	Q09472		8	4.85	5	100		12	6.55	5	100
	Histone H4	P62805		3	33.01	3	97		3	33.01	5	95
	Hornerin	Q86YZ3		7	5.26	5	100		2	1.26	2	100
	Importin subunit alpha-2	P52292		2	6.24	5	100		7	18.71	5	100
	Importin subunit beta-1	Q14974		5	8.68	3	100		4	6.62	3	90
	Inosine-5'-monophosphate dehydrogenase 2	P12268		9	21.21	5	100		12	28.99	5	100
	Insulin-like growth factor 2 mRNA-binding protein 1	Q9NZI8		13	29.29	5	100		18	35.88	5	100
	Insulin-like growth factor 2 mRNA-binding protein 3	O00425		13	28.5	5	100		17	33.68	5	100
	Interleukin enhancer-binding factor 2	Q12905		9	40.77	5	100		11	44.1	5	100
	Interleukin enhancer-binding factor 3	Q12906		21	30.76	5	100		31	53.36	5	100
	Histone-arginine methyltransferase CARM1	Q86X55		10	17.26	5	100		11	20.85	5	100
	Ribosome-binding protein 1	Q9P2E9		24	23.81	5	100		14	14.36	5	100
	Calcium/calmodulin-dependent protein kinase type II subunit gamma	Q13555		3	8.89	5	94		4	11.52	5	95
	RNA binding protein fox-1 homolog 2	O43251		2	10.79	3	100		3	13.42	5	100
	Catenin delta-1	O60716		35	46.96	5	100		37	46.22	5	100
	40S ribosomal protein S24	P62847		3	29.23	5	100		4	30	5	100
	5'-3' exoribonuclease 1	Q8IZH2		20	14.17	5	100		17	13.05	5	100
	5'-3' exoribonuclease 2	Q9H0D6		14	18.31	5	100		14	19.57	5	100
	60S ribosomal protein L11	P62913		3	16.95	5	96		4	29.38	5	99
	ADP-ribosylation factor GTPase-activating protein 1	Q8N6T3		1	3.38	2	98		1	3.38	4	94
	ADP-ribosylation factor-like protein 6-interacting protein 4	Q66PJ3		2	7.1	3	99		4	13.92	3	100
	Ankycorbin	Q9P0K7		30	34.59	5	100		27	32.55	4	100
	Annexin A2	P07355		17	49.58	5	100		15	44.26	5	100
	Annexin A7	P20073		6	15.45	5	100		7	16.95	4	100
	AP-2 complex subunit beta	P63010		10	18.3	3	100		12	18.09	5	100
	ATPase family AAA domain-containing protein 3A	Q9NVI7		9	18.6	4	100		6	14.33	4	99
	ATP-binding cassette sub-family F member 1	Q8NE71		1	1.86	3	91		2	3.22	2	92
	AT-rich interactive domain-containing protein 1B	Q8NFD5		23	14.81	5	100		34	21.61	5	100
	Bcl-2-associated transcription factor 1	Q9NYF8		7	9.69	2	100		4	5.45	5	99
	Carnitine O-palmitoyltransferase 1, liver isoform	P50416		4	5.95	4	98		3	4.37	5	99
	CCR4-NOT transcription complex subunit 1	A5YKK6		21	11.47	5	100		40	23.37	5	100
	CCR4-NOT transcription complex subunit 10	Q9H9A5		2	2.96	2	98		4	6.06	5	99
	Clathrin heavy chain 1	Q00610		62	45.64	5	100		65	49.79	5	100
	Cleavage and polyadenylation specificity factor subunit 6	Q16630		9	21.43	5	100		8	19.56	5	100
	Cleavage and polyadenylation specificity factor subunit 7	Q8N684		7	22.29	4	100		8	23.16	5	100
	Collagen alpha-3(VI) chain	P12111		62	27.73	5	100		6	3.1	5	92
	Cytoplasmic polyadenylation element-binding protein 4	Q17RY0		6	11.24	5	96		10	21.07	5	100
	DNA-dependent protein kinase catalytic subunit	P78527		6	1.51	5	98		14	4.39	5	100
	Double-stranded RNA-binding protein Staufen homolog 2	Q9NUL3		4	8.74	5	100		9	21	5	100
	Dynamin-binding protein	Q6XZF7		1	2.79	2	99		1	2.79	2	100
	Elongation factor 1-delta	P29692		3	7.57	5	100		4	9.43	4	100
	Eukaryotic translation initiation factor 3 subunit B	P55884		11	16.84	5	100		11	17.87	5	100
	Eukaryotic translation initiation factor 4E	P06730		5	21.77	5	99		6	24.6	5	95
	Extended synaptotagmin-1	Q9BSJ8		4	5.03	2	99		2	2.6	2	99
	F-actin-capping protein subunit beta	P47756		9	28.31	5	100		8	28.31	3	100
	Far upstream element-binding protein 1	Q96AE4		6	11.33	5	91		12	21.75	5	100
	FERM domain-containing protein 6	Q96NE9		1	2.44	4	97		6	13.52	4	100
	Filamin-A	P21333		64	35.43	5	100		67	37.89	5	100
	Filamin-B	O75369		35	18.7	5	100		44	23.04	5	100
	Filamin-C	Q14315		28	15.27	5	100		39	21.06	5	100
	Gamma-interferon-inducible protein 16	Q16666		12	18.38	5	100		15	22.91	5	100
	Golgin subfamily A member 2	Q08379		1	1.77	2	91		2	3.71	3	93
	Heat shock protein HSP 90-alpha	P07900		14	17.33	5	100		10	13.58	5	100
	Heterogeneous nuclear ribonucleoprotein A/B	Q99729		6	22.29	5	100		6	22.29	5	100
	Heterogeneous nuclear ribonucleoprotein M	P52272		24	46.6	5	100		23	43.85	5	100
	Heterogeneous nuclear ribonucleoprotein R	O43390		17	31.13	5	96		19	37.42	5	100
	Heterogeneous nuclear ribonucleoprotein U-like protein 1	Q9BUJ2		20	28.73	5	100		23	35.57	5	100
	Histone deacetylase 3	O15379		1	3.96	2	98		4	15.62	4	100
	Insulin-like growth factor 2 mRNA-binding protein 2	Q9Y6M1		15	34.53	5	100		17	38.13	5	100
	Kinectin	Q86UP2		4	3.54	5	95		6	5.77	4	100
	Leucine zipper protein 1	Q86V48		8	9.65	4	100		4	5.36	2	100
	Liprin-beta-1	Q86W92		9	11.54	4	99		10	12.84	5	100
	MAP/microtubule affinity-regulating kinase 3	P27448		2	4.52	2	99		2	4.52	4	97
	Mediator of RNA polymerase II transcription subunit 12	Q93074		3	1.42	4	92		14	10.18	4	100
	Melanoma-associated antigen D1	Q9Y5V3		1	1.8	5	99		2	3.24	5	99
	Microtubule-associated protein 4	P27816		6	8.68	5	100		8	11.34	5	100
	Mitotic checkpoint protein BUB3	O43684		6	22.09	5	96		4	12.88	5	90
	mRNA cap guanine-N7 methyltransferase	O43148		6	13.49	5	99		6	13.49	5	99
	Myosin phosphatase Rho-interacting protein	Q6WCQ1		29	39.21	5	100		32	40.75	4	100
	Myosin-10	P35580		85	49.1	5	100		88	46.99	5	100
	Myosin-14	Q7Z406		47	28.83	5	100		42	24.56	5	100
	Myosin-Va	Q9Y4I1		55	36.82	5	100		48	31.4	3	100
	Nidogen-2	Q14112		15	16.41	5	100		8	8.32	5	100
	Nuclear pore complex protein Nup214	P35658		6	4.52	5	97		24	17.08	5	100
	PAB-dependent poly(A)-specific ribonuclease subunit 2	Q504Q3		23	21.04	5	100		25	22.87	5	100
	Partner of Y14 and mago	Q9BRP8		3	22.66	5	99		3	20.69	5	99
	Plasminogen activator inhibitor 1 RNA-binding protein	Q8NC51		9	24.13	5	100		12	33.33	5	100
	Plectin	Q15149		224	51.49	5	100		234	53.26	5	100
	Poly(U)-binding-splicing factor PUF60	Q9UHX1		13	33.58	5	100		15	37.08	5	100
	Polyadenylate-binding protein 2	Q86U42		4	13.18	5	95		5	31.42	4	100
	Polyadenylate-binding protein 4	Q13310		29	47.23	5	100		30	49.76	5	100
	Polypyrimidine tract-binding protein 1	P26599		12	37.09	5	100		9	28.73	5	100
	Probable ubiquitin carboxyl-terminal hydrolase FAF-X	Q93008		20	10.1	5	100		24	12.1	5	100
	Protein arginine N-methyltransferase 1	Q99873		8	18.44	5	100		12	28.24	5	100
	Protein disulfide-isomerase A6	Q15084		14	36.59	5	100		13	34.76	5	100
	Protein FAM98A	Q8NCA5		11	34.75	5	100		12	36.68	5	100
	Protein LSM12 homolog	Q3MHD2		3	25.76	5	100		5	34.34	5	100
	Protein transport protein Sec24B	O95487		18	22.47	5	100		20	23.76	5	100
	Protein transport protein Sec31A	O94979		20	20.75	5	100		25	25.73	5	100
	Pumilio homolog 1	Q14671		12	13.86	5	100		18	19.79	5	100
	Putative ATP-dependent RNA helicase DHX30	Q7L2E3		39	40.59	5	100		37	37.89	5	100
	R3H domain-containing protein 1	Q15032		7	11.03	5	100		12	18.56	5	100
	Regulator of nonsense transcripts 1	Q92900		33	34.79	5	100		37	39.09	5	100
	Rho guanine nucleotide exchange factor 2	Q92974		7	9.95	5	100		7	9.54	4	100
	RNA-binding protein 47	A0AV96		2	6.87	2	97		2	6.87	4	100
	RNA-binding protein 8A	Q9Y5S9		3	21.97	5	100		3	21.97	5	100
	RNA-binding protein Musashi homolog 2	Q96DH6		3	18.33	5	97		5	29.48	4	100
	Roquin	Q5TC82		7	10.58	4	100		9	12.89	4	100
	Selenocysteine insertion sequence-binding protein 2	Q96T21		1	1.79	2	98		1	1.79	2	92
	Selenocysteine insertion sequence-binding protein 2-like	Q93073		4	7.1	3	100		4	6.53	5	97
	Serrate RNA effector molecule homolog	Q9BXP5		5	7	5	95		6	9.86	5	99
	Single-stranded DNA-binding protein 3	Q9BWW4		3	10.53	4	99		5	21.33	5	100
	SPATS2-like protein	Q9NUQ6		6	17.59	5	100		6	17.18	4	100
	Splicing factor 1	Q15637		7	19.28	5	100		7	19.59	5	100
	Splicing factor U2AF 65 kDa	P26368		6	22.93	5	100		7	26.11	5	100
	SWI/SNF complex subunit SMARCC2	Q8TAQ2		37	32.83	5	100		44	38.85	5	100
	TAR DNA-binding protein 43	Q13148		2	5.05	5	99		7	20.91	5	100
	Transcription factor 20	Q9UGU0		2	1.81	4	99		6	5.52	5	100
	Transcription factor BTF3	P20290		2	27.16	2	99		2	29.01	3	100
	Trinucleotide repeat-containing gene 6B protein	Q9UPQ9		43	41.5	5	100		39	35.64	5	100
	Trinucleotide repeat-containing gene 6C protein	Q9HCJ0		26	24.29	5	100		23	21.86	5	100
	Tropomyosin alpha-3 chain	P06753		11	39.11	5	100		8	26.61	5	100
	U2 snRNP-associated SURP motif-containing protein	O15042		9	14.49	5	100		19	29.96	5	100
	Ubiquitin carboxyl-terminal hydrolase 10	Q14694		17	27.78	5	100		17	25.77	5	100
	Ubiquitin carboxyl-terminal hydrolase 15	Q9Y4E8		4	5.67	5	100		3	3.99	5	97
	Ubiquitin-associated protein 2-like	Q14157		24	44.76	5	100		25	44.76	5	100
	UDP-glucose:glycoprotein glucosyltransferase 1	Q9NYU2		18	14.57	5	100		21	19.2	5	100
	Uncharacterized protein KIAA0889	O94964		5	3.79	5	99		4	3.43	4	94
	UPF0515 protein C19orf66	Q9NUL5		1	7.5	2	98		1	7.5	4	96
	Zinc finger and BTB domain-containing protein 1	Q9Y2K1		4	6.21	5	100		6	10.25	5	100
	Zinc finger protein 598	Q86UK7		4	5.8	5	100		2	2.34	4	99
	Centrosomal protein of 170 kDa	Q5SW79		3	2.96	5	100		1	0.94	2	97
	Fibronectin	P02751		41	27.43	5	100		25	16.31	5	100
	G patch domain-containing protein 4	Q5T3I0		2	6.43	3	100		5	14.41	5	100
	Heterogeneous nuclear ribonucleoprotein D0	Q14103		6	23.2	5	100		10	34.31	5	100
	Heterogeneous nuclear ribonucleoprotein K	P61978		17	47.73	5	100		19	48.18	5	100
	La-related protein 4	Q71RC2		14	26	5	100		13	23.93	5	100
	LIM domain-binding protein 1	Q86U70		3	12	5	100		4	14.67	5	100
	Myosin-10	P35580		86	48.82	5	100		88	46.87	5	100
	Myosin-Ic	O00159		43	47.89	5	100		38	39.94	4	100
	Palladin	Q8WX93		11	14.19	5	100		11	11.09	5	100
	Protein phosphatase 1 regulatory subunit 12C	Q9BZL4		2	3.46	5	100		2	3.46	3	98
	Pumilio homolog 2	Q8TB72		11	11.94	5	100		14	15.32	5	100
	Sperm-specific antigen 2	P28290		12	12.5	5	100		11	11.7	5	100
	SWI/SNF-related matrix-associated actin-dependent regulator of chromatin subfamily D member 2	Q92925		15	45.13	5	100		19	52.17	5	100
	Tissue-type plasminogen activator	P00750		2	6.4	3	100		4	11.24	5	100
	Ataxin-2	Q99700		20	20.92	5	100		26	28.24	5	100
	CCR4-NOT transcription complex subunit 2	Q9NZN8		3	9.89	5	100		6	21.26	5	100
	Double-stranded RNA-specific adenosine deaminase	P55265		4	3.94	3	100		6	6.23	3	100
	Interleukin enhancer-binding factor 3	Q12906		20	37.82	5	100		28	52.15	5	100
	LIM domain and actin-binding protein 1	Q9UHB6		12	22.76	3	100		5	8.29	4	98
	Multiple myeloma tumor-associated protein 2	Q9BU76		1	7.41	2	96		1	7.41	3	99
	Nuclear receptor corepressor 2	Q9Y618		16	9.33	5	100		21	13.6	4	100
	Probable ATP-dependent RNA helicase DDX17	Q92841		25	38.96	5	100		26	39.37	5	100
	Protein PRRC2C	Q9Y520		49	24.71	5	100		53	25.45	5	100
	Catenin delta-1	O60716		24	44.48	5	100		24	40.75	5	100
	Afadin	P55196		12	9.54	4	96		17	13.25	5	98
	Fragile X mental retardation 1 protein	Q06787		9	18.81	5	100		10	21.02	5	100
	Nuclear receptor coactivator 3	Q9Y6Q9		14	16.27	5	100		21	21.41	5	100
	Protein transport protein Sec16A	O15027		46	31.89	5	100		43	35.67	5	100
	Trinucleotide repeat-containing gene 6A protein	Q8NDV7		35	27.71	5	100		36	29.12	5	100
	Heterogeneous nuclear ribonucleoprotein A1	P09651		15	46.88	5	100		15	43.12	5	100
	AP-2 complex subunit alpha-1	O95782		6	9.21	2	100		8	11.1	5	100
	Ras GTPase-activating protein-binding protein 2	Q9UN86		13	40.98	5	100		14	41.2	5	100
	SWI/SNF-related matrix-associated actin-dependent regulator of chromatin subfamily B member 1	Q12824		9	35.11	5	100		9	31.12	5	94
	Heterogeneous nuclear ribonucleoproteins C1/C2	P07910		7	29.01	5	100		11	37.88	5	100
	Calcium/calmodulin-dependent protein kinase type II subunit delta	Q13557		5	14.23	5	100		5	14.23	5	100
	Profilin-2	P35080		1	10	4	99		1	10	5	98
	Lysyl-tRNA synthetase	Q15046		6	12.8	5	100		8	14.24	5	100
	Arginyl-tRNA synthetase, cytoplasmic	P54136		13	26.7	5	100		10	22.45	5	100
	Clathrin light chain A	P09496		4	21.56	5	100		5	25.23	5	100
	Clathrin light chain B	P09497		6	21.8	5	100		6	21.8	5	100
	14-3-3 protein beta/alpha	P31946		7	30.74	5	100		4	21.31	4	100
	Adenomatous polyposis coli protein	P25054		3	2.19	4	99		4	2.12	5	100
	Antigen KI-67	P46013		4	1.97	3	100		5	2.59	4	100
	Cold shock domain-containing protein E1	O75534		12	17.47	5	99		11	15.12	5	100
	Double-stranded RNA-binding protein Staufen homolog 1	O95793		8	19.56	5	100		10	25.6	5	100
	Probable global transcription activator SNF2L2	P51531		20	15.33	5	100		30	19.66	5	100
	RNA-binding protein FUS	P35637		12	28	5	100		13	28.76	5	100
	TATA-binding protein-associated factor 2N	Q92804		8	21.39	5	100		12	32.6	5	100
	Tight junction protein ZO-1	Q07157		32	26.44	5	100		40	33.15	5	100
	Small nuclear ribonucleoprotein-associated proteins B and B'	P14678		4	13.42	5	97		4	19.05	5	98
	Myosin light polypeptide 6	P60660		10	62.91	5	100		9	55.63	5	100
	Isoleucyl-tRNA synthetase, cytoplasmic	P41252		10	9.67	4	100		13	11.73	5	100
	Kelch-like protein 12	Q53G59		5	10.39	5	100		5	12.15	5	100
	Keratin, type I cytoskeletal 10	P13645		29	48.8	5	100		28	48.8	5	100
	Keratin, type I cytoskeletal 14	P02533		21	48.31	5	100		12	23.52	5	100
	Keratin, type I cytoskeletal 16	P08779		19	44.82	5	100		12	25.58	5	99
	Keratin, type I cytoskeletal 9	P35527		27	59.55	5	100		23	54.74	5	100
	Keratin, type II cytoskeletal 1	P04264		33	51.71	5	100		29	43.48	5	100
	Keratin, type II cytoskeletal 2 epidermal	P35908		38	72.61	5	100		30	63.07	5	100
	Keratin, type II cytoskeletal 5	P13647		22	33.73	5	100		17	25.93	5	100
	KH domain-containing, RNA-binding, signal transduction-associated protein 1	Q07666		9	27.99	5	100		10	27.77	5	100
	Kinesin-1 heavy chain	P33176		3	3.12	4	100		4	4.47	4	99
	Lamina-associated polypeptide 2, isoform alpha	P42166		20	47.41	5	100		10	24.5	5	100
	Laminin subunit gamma-1	P11047		3	2.24	2	97		3	3.67	3	100
	La-related protein 1	Q6PKG0		37	43.43	5	100		43	51.82	5	100
	La-related protein 4B	Q92615		6	9.35	5	100		9	16.8	5	100
	Leucine-rich PPR motif-containing protein, mitochondrial	P42704		12	12.2	5	100		16	16.79	5	100
	Leucine-rich repeat-containing protein 47	Q8N1G4		2	2.74	4	99		2	2.74	2	98
	LIM domain-containing protein 1	Q9UGP4		9	21.3	5	100		11	31.21	5	100
	Lipoma-preferred partner	Q93052		13	37.42	5	100		15	39.05	5	100
	Luc7-like protein 3	O95232		4	11.57	5	100		6	17.36	4	100
	Lysyl oxidase homolog 2	Q9Y4K0		7	8.91	5	97		7	10.08	5	100
	Major vault protein	Q14764		34	51.62	5	100		28	41.77	5	100
	Malectin	Q14165		13	42.81	5	100		13	40.41	5	100
	Matrin-3	P43243		12	20.66	5	100		17	26.45	5	100
	Melanoma-associated antigen 10	P43363		3	10.03	5	100		3	9.21	5	91
	Melanoma-associated antigen B2	O15479		8	24.45	5	100		7	24.14	5	100
	Microfibrillar-associated protein 1	P55081		8	24.6	5	100		8	27.11	5	100
	Microtubule-associated protein 1B	P46821		68	38.05	5	100		71	41.33	5	100
	Mini-chromosome maintenance complex-binding protein	Q9BTE3		9	14.8	5	100		14	26.79	5	100
	Myosin light chain 6B	P14649		6	37.5	4	100		6	32.69	5	100
	Myosin-11	P35749		21	9.74	5	100		20	8.42	5	99
	Myosin-9	P35579		143	62.24	5	100		141	60.71	5	100
	Myosin-Ib	O43795		41	41.2	5	100		30	33.98	4	100
	Myosin-Ie	Q12965		14	16.88	3	100		13	15.43	3	100
	Nascent polypeptide-associated complex subunit alpha	Q13765		3	19.53	5	99		3	19.53	5	100
	Negative elongation factor E	P18615		2	6.58	3	99		3	12.89	3	97
	Nestin	P48681		4	3.08	3	97		9	6.79	2	100
	Neuroblast differentiation-associated protein AHNAK	Q09666		56	13.82	5	100		65	15.79	5	100
	Neurofilament light polypeptide	P07196		5	10.13	4	100		16	32.41	3	100
	Neuronal acetylcholine receptor subunit alpha-7	P36544		1	3.98	5	100		1	3.98	5	98
	NFX1-type zinc finger-containing protein 1	Q9P2E3		4	2.92	4	93		6	4.69	5	100
	Non-POU domain-containing octamer-binding protein	Q15233		18	43.1	5	100		18	44.59	5	100
	Nuclear cap-binding protein subunit 1	Q09161		6	10.38	4	100		14	21.9	5	100
	Nuclear fragile X mental retardation-interacting protein 2	Q7Z417		21	45.9	5	100		22	47.63	5	100
	Nuclear pore complex protein Nup88	Q99567		2	3.37	2	99		8	17.81	4	100
	Nuclear speckle splicing regulatory protein 1	Q9H0G5		3	6.27	3	98		5	10.75	2	100
	Nuclease-sensitive element-binding protein 1	P67809		16	55.86	5	100		15	55.56	5	100
	Nucleolin	P19338		16	23.24	5	100		16	22.54	5	100
	Nucleolysin TIA-1 isoform p40	P31483		5	14.25	5	98		7	20.98	5	99
	Nucleolysin TIAR	Q01085		9	32.53	5	100		8	29.87	5	100
	Nucleophosmin	P06748		5	25.85	5	100		7	31.29	5	100
	Nucleosome assembly protein 1-like 1	P55209		3	9.97	5	97		2	8.95	3	99
	PAB-dependent poly(A)-specific ribonuclease subunit 3	Q58A45		14	20.41	5	100		21	39.46	5	100
	Paraspeckle component 1	Q8WXF1		6	16.63	3	100		6	19.31	5	100
	Peflin	Q9UBV8		5	18.66	3	99		6	18.66	5	100
	Peroxiredoxin-1	Q06830		11	49.75	5	100		11	49.75	5	100
	Peroxiredoxin-2	P32119		4	18.69	4	97		7	32.32	5	100
	Peroxiredoxin-4	Q13162		5	18.45	5	99		6	23.25	5	100
	Peroxisomal multifunctional enzyme type 2	P51659		13	25.68	5	100		16	33.56	5	100
	Peroxisomal proliferator-activated receptor A-interacting complex 285 kDa protein	Q9BYK8		14	7.17	5	100		21	11.36	5	100
	PERQ amino acid-rich with GYF domain-containing protein 2	Q6Y7W6		8	7.78	5	100		7	7.08	5	100
	Plectin	Q15149		226	50.68	5	100		238	53.25	5	100
	Poly(rC)-binding protein 1	Q15365		7	29.49	5	100		9	32.87	5	100
	Poly(rC)-binding protein 2	Q15366		5	20.55	5	99		7	28.49	5	100
	Polyadenylate-binding protein 1	P11940		34	59.75	5	100		36	61.01	5	100
	Prelamin-A/C	P02545		23	41.87	5	100		14	27.41	5	100
	Pre-mRNA-splicing regulator WTAP	Q15007		1	3.79	2	99		1	3.79	2	92
	Probable ATP-dependent RNA helicase DDX41	Q9UJV9		2	2.57	2	98		1	2.41	3	96
	Probable ATP-dependent RNA helicase DDX46	Q7L014		16	18.23	5	100		22	25.51	5	100
	Probable ATP-dependent RNA helicase DDX5	P17844		28	44.63	5	100		28	44.63	5	100
	Probable ATP-dependent RNA helicase DDX6	P26196		11	34.99	5	100		11	34.58	5	100
	Probable ATP-dependent RNA helicase DHX36	Q9H2U1		25	29.27	5	100		23	27.48	5	100
	Probable ATP-dependent RNA helicase YTHDC2	Q9H6S0		7	6.15	4	100		17	15.73	5	100
	Probable E3 ubiquitin-protein ligase TRIP12	Q14669		4	2.86	2	90		5	3.26	4	100
	Probable helicase with zinc finger domain	P42694		14	9.22	5	100		24	15.76	5	100
	Procollagen galactosyltransferase 1	Q8NBJ5		11	18.65	5	100		10	17.04	5	100
	Procollagen-lysine,2-oxoglutarate 5-dioxygenase 1	Q02809		13	22.7	5	100		16	28.47	5	100
	Procollagen-lysine,2-oxoglutarate 5-dioxygenase 3	O60568		7	12.06	5	100		9	14.63	5	100
	Programmed cell death protein 6	O75340		4	21.47	5	95		6	42.41	4	100
	Prolyl 3-hydroxylase 3	Q8IVL6		3	6.66	2	100		3	6.93	3	97
	Protein arginine N-methyltransferase 5	O14744		2	4.71	3	98		4	10.05	4	100
	Protein argonaute-1	Q9UL18		28	42.82	5	100		28	43.52	5	100
	Protein argonaute-2	Q9UKV8		28	39.7	5	100		32	46.92	5	100
	Protein argonaute-3	Q9H9G7		22	31.63	5	100		24	36.28	5	100
	Protein CASC3	O15234		5	10.95	3	100		8	20.06	5	100
	Protein disulfide-isomerase A3	P30101		13	31.88	5	100		5	13.66	4	97
	Protein disulfide-isomerase A4	P13667		13	27.44	5	100		4	9.3	2	100
	Protein disulfide-isomerase	P07237		10	22.64	5	100		8	15.94	5	100
	Protein FAM195A	Q9BUT9		5	35	5	100		7	61.25	5	100
	Protein FAM195B	C9JLW8		3	41.24	5	96		4	50.52	5	100
	Protein KIAA1967	Q8N163		7	12.24	4	100		17	28.49	5	100
	Protein pelota homolog	Q9BRX2		1	3.64	4	98		1	3.64	3	96
	Protein phosphatase 1 regulatory subunit 12A	O14974		15	17.28	5	100		17	18.45	5	100
	Protein PRRC2A	P48634		31	20.58	5	100		33	23.6	5	100
	Protein PRRC2B	Q5JSZ5		14	9.02	5	100		23	15.57	5	100
	Protein salvador homolog 1	Q9H4B6		7	22.72	4	100		6	16.45	5	100
	Protein SEC13 homolog	P55735		6	16.15	5	97		5	16.15	5	99
	Protein syndesmos	Q9BRJ7		4	24.64	4	98		5	31.28	4	100
	Protein TFG	Q92734		15	39.75	5	100		14	39.25	5	100
	Protein transport protein Sec16A	O15027		47	34.1	5	100		42	35.15	5	100
	Protein transport protein Sec23A	Q15436		11	17.65	5	100		14	24.97	5	100
	Protein transport protein Sec23B	Q15437		14	23.6	5	100		23	43.94	5	100
	Protein transport protein Sec24A	O95486		13	15.19	5	100		20	22.6	5	100
	Protein transport protein Sec24C	P53992		16	21.21	5	100		17	21.66	5	100
	Protein transport protein Sec61 subunit beta	P60468		1	15.62	4	98		1	15.62	5	95
	Protein-glutamine gamma-glutamyltransferase 2	P21980		13	24.89	5	100		10	19.21	5	100
	Pumilio homolog 1	Q14671		11	12.14	5	93		18	19.22	5	99
	Putative ATP-dependent RNA helicase DHX57	Q6P158		4	2.67	5	98		10	9.38	4	100
	Putative deoxyribose-phosphate aldolase	Q9Y315		4	15.41	3	99		6	26.42	5	100
	Putative E3 ubiquitin-protein ligase makorin-4	Q13434		3	8.45	2	98		3	8.45	4	99
	Putative helicase MOV-10	Q9HCE1		27	35.59	5	100		29	35.89	5	100
	Putative pre-mRNA-splicing factor ATP-dependent RNA helicase DHX15	O43143		21	30.82	5	100		19	27.8	5	100
	Putative RNA polymerase II subunit B1 CTD phosphatase RPAP2	Q8IXW5		2	4.25	2	97		5	12.09	4	100
	Putative RNA-binding protein 3	P98179		4	45.86	5	99		4	40.76	5	100
	Putative RNA-binding protein Luc7-like 2	Q9Y383		8	22.19	5	100		9	23.98	5	98
	Putative rRNA methyltransferase 3	Q8IY81		10	21.25	5	100		11	21.72	5	100
	Pyruvate kinase isozymes M1/M2	P14618		11	27.31	5	100		8	22.03	5	100
	Ras GTPase-activating protein-binding protein 1	Q13283		18	60.09	5	100		20	60.3	5	100
	Ras GTPase-activating protein-binding protein 2	Q9UN86		12	34.02	5	94		14	36.31	5	98
	Ras suppressor protein 1	Q15404		5	24.19	4	100		7	31.77	5	99
	Reticulocalbin-2	Q14257		2	13.25	2	100		3	18.3	3	100
	Rho GTPase-activating protein 31	Q2M1Z3		1	1.11	2	97		1	1.11	4	99
	Ribonuclease inhibitor	P13489		2	6.51	4	98		2	6.51	2	97
	RNA-binding motif, single-stranded-interacting protein 2	Q15434		2	8.6	4	96		3	11.79	4	99
	RNA-binding protein 14	Q96PK6		20	29.45	5	100		25	37.82	5	100
	RNA-binding protein 27	Q9P2N5		5	5.75	4	100		7	7.26	5	100
	RNA-binding protein 6	P78332		21	23.69	5	100		33	34.28	5	100
	RNA-binding protein EWS	Q01844		10	24.24	5	100		12	26.98	5	100
	S-adenosylmethionine synthase isoform type-2	P31153		4	13.16	5	99		3	9.37	5	99
	SEC16A protein (Fragment)	A4QN19		40	34.92	5	100		35	34.05	5	100
	SEC23-interacting protein	Q9Y6Y8		7	7.9	5	95		12	15.5	5	100
	Sequestosome-1	Q13501		8	36.14	5	100		3	10.68	4	99
	Serine/arginine-rich splicing factor 1	Q07955		8	35.08	5	100		11	39.52	5	100
	Serine/arginine-rich splicing factor 2	Q01130		3	14.48	3	99		3	14.48	4	100
	Serine/threonine-protein kinase 3	Q13188		7	17.72	4	100		10	26.68	5	100
	Serine/threonine-protein phosphatase 2A 65 kDa regulatory subunit A alpha isoform	P30153		11	25.81	5	100		16	35.48	5	100
	Serine/threonine-protein phosphatase 2A catalytic subunit beta isoform	P62714		3	16.5	4	99		7	26.54	5	98
	Serine/threonine-protein phosphatase 2A regulatory subunit B'' subunit alpha	Q06190		11	10.78	5	100		17	17.3	5	100
	Serine-threonine kinase receptor-associated protein	Q9Y3F4		7	31.14	5	100		9	36.57	5	100
	Serpin H1	P50454		12	38.76	5	100		7	25.6	5	100
	SH3 domain-binding protein 4	Q9P0V3		3	4.26	3	98		5	7.37	4	100
	Signal recognition particle 14 kDa protein	P37108		1	10.29	2	96		1	10.29	4	98
	Single-stranded DNA-binding protein 4	Q9BWG4		3	9.87	5	97		3	9.87	4	95
	Small nuclear ribonucleoprotein E	P62304		1	11.96	5	96		2	25	4	98
	Small nuclear ribonucleoprotein F	P62306		2	15.12	5	100		2	15.12	5	100
	Small nuclear ribonucleoprotein Sm D1	P62314		4	36.97	5	100		3	36.97	5	100
	Small nuclear ribonucleoprotein Sm D2	P62316		3	31.36	5	100		4	31.36	5	100
	Small nuclear ribonucleoprotein Sm D3	P62318		2	15.08	4	92		2	15.08	5	98
	SMARCA4 isoform 3	B1A8Z4		41	30.5	5	100		54	40.86	5	100
	Spectrin alpha chain, brain	Q13813		43	21.44	5	100		34	17.64	5	100
	Spectrin beta chain, brain 1	Q01082		39	21.79	5	100		19	10.66	5	100
	Spermatogenesis-associated serine-rich protein 2	Q86XZ4		6	16.15	5	100		4	10.46	5	100
	S-phase kinase-associated protein 1	P63208		1	7.36	3	91		1	7.36	2	93
	Splicing factor 3B subunit 1	O75533		9	11.73	5	100		17	21.32	5	100
	Splicing factor 3B subunit 2	Q13435		9	11.73	5	100		16	24.58	5	100
	Splicing factor 3B subunit 3	Q15393		10	9.86	5	100		13	13.72	5	100
	Splicing factor 3B subunit 4	Q15427		1	3.3	2	97		1	3.3	4	97
	Splicing factor 45	Q96I25		5	15.46	3	96		5	14.71	5	98
	Splicing factor U2AF 35 kDa subunit	Q01081		1	5.42	3	91		3	16.25	2	100
	Splicing factor, proline- and glutamine-rich	P23246		19	30.83	5	100		21	31.26	5	100
	Src substrate cortactin	Q14247		18	40.18	5	100		20	43.09	5	100
	Stress-70 protein, mitochondrial	P38646		29	48.75	5	100		30	51.84	5	100
	Structural maintenance of chromosomes protein 3	Q9UQE7		1	1.73	2	99		1	1.73	4	99
	Supervillin	O95425		17	12.01	3	100		9	6.55	4	100
	SWI/SNF complex subunit SMARCC1	Q92922		23	22.53	5	100		43	32.94	5	100
	SWI/SNF complex subunit SMARCC2	Q8TAQ2		37	31.05	5	100		44	36.66	5	100
	WI/SNF-related matrix-associated actin-dependent regulator of chromatin subfamily B member 1	Q12824		9	32.73	5	100		10	34.29	5	100
	SWI/SNF-related matrix-associated actin-dependent regulator of chromatin subfamily D member 1	Q96GM5		10	27.57	5	100		13	35.92	5	100
	SWI/SNF-related matrix-associated actin-dependent regulator of chromatin subfamily E member 1	Q969G3		19	53.04	5	100		23	66.18	5	100
	T-complex protein 1 subunit beta	P78371		7	21.12	5	100		4	11.78	5	100
	T-complex protein 1 subunit delta	P50991		7	19.85	2	100		8	21.89	5	100
	T-complex protein 1 subunit zeta	P40227		6	14.31	4	99		3	8.85	4	97
	Telomerase-binding protein EST1A	Q86US8		3	3.03	2	99		3	3.24	4	100
	Tetratricopeptide repeat protein 37	Q6PGP7		4	3.84	2	93		17	13.87	4	100
	TGF-beta-activated kinase 1 and MAP3K7-binding protein 1	Q15750		6	15.87	3	98		8	25	4	100
	Thioredoxin domain-containing protein 5	Q8NBS9		5	15.74	5	100		4	11.34	4	99
	THO complex subunit 4	Q86V81		3	15.18	4	99		3	15.18	3	99
	Thyroid hormone receptor-associated protein 3	Q9Y2W1		4	5.24	5	98		6	8.8	4	100
	Thyroid receptor-interacting protein 6	Q15654		7	28.15	5	100		8	31.93	5	100
	Tight junction protein ZO-1	Q07157		33	26.37	5	100		41	32.61	5	100
	Tight junction protein ZO-2	Q9UDY2		28	30.92	5	100		27	30.5	5	100
	Transcription activator BRG1	P51532		40	27.99	5	100		54	39.1	5	100
	Transcription intermediary factor 1-beta	Q13263		4	6.95	5	100		12	25.15	5	100
	Transcriptional activator GLI3	P10071		1	0.76	3	96		1	0.76	4	99
	Transcriptional activator protein Pur-alpha	Q00577		7	33.85	5	100		7	33.85	5	100
	Transcriptional activator protein Pur-beta	Q96QR8		5	33.33	5	100		5	33.33	5	100
	Transcriptional-regulating factor 1	Q96PN7		3	3	4	98		6	8.25	4	100
	Transitional endoplasmic reticulum ATPase	P55072		14	23.08	5	100		18	25.43	5	100
	Trifunctional purine biosynthetic protein adenosine-3	P22102		6	6.04	3	99		3	4.85	4	96
	tRNA-splicing ligase RtcB homolog	Q9Y3I0		23	54.26	5	100		23	53.86	5	100
	Tropomodulin-3	Q9NYL9		11	41.19	3	100		8	33.52	2	100
	Tropomyosin alpha-4 chain	P67936		8	25.81	5	100		6	18.55	2	100
	Tubulin alpha-1A chain	Q71U36		10	30.6	5	97		12	38.36	5	100
	Tubulin alpha-1B chain	P68363		11	33.7	5	99		12	38.36	5	99
	Tubulin beta chain	P07437		18	59.01	5	100		18	59.01	5	100
	Tubulin beta-2A chain	Q13885		14	40.9	5	98		14	40.22	5	100
	Tubulin beta-2C chain	P68371		18	58.88	5	100		17	52.81	5	100
	Tubulin beta-4 chain	P04350		15	51.8	5	100		14	45.72	5	99
	Tubulin beta-6 chain	Q9BUF5		10	29.37	5	100		11	31.39	5	100
	Tuftelin-interacting protein 11	Q9UBB9		7	11.71	5	100		5	8.84	2	93
	Tyrosine-protein phosphatase non-receptor type 11	Q06124		3	6.37	2	95		3	6.53	2	99
	U1 small nuclear ribonucleoprotein 70 kDa	P08621		10	30.21	5	100		10	29.98	5	100
	U1 small nuclear ribonucleoprotein A	P09012		5	24.11	5	100		7	30.85	5	100
	U1 small nuclear ribonucleoprotein C	P09234		1	7.55	5	94		1	7.55	5	97
	Ubiquitin-associated protein 2	Q5T6F2		9	13.05	5	100		17	26.18	5	100
	Ubiquitin-associated protein 2-like	Q14157		23	38.36	5	100		24	38.36	5	100
	Uncharacterized protein C14orf43	Q6PJG2		7	10.62	5	100		5	6.99	5	100
	Uncharacterized protein C15orf52	Q6ZUT6		3	7.12	3	100		2	4.49	2	94
	Uncharacterized protein ATXN2	F8W0B5		6	38.53	5	93		6	38.53	5	91
	Uncharacterized protein ATXN2	F8WB06		20	23.9	5	100		25	31.71	5	100
	Uncharacterized protein DST	E9PEB9		37	6.3	5	100		11	1.87	5	90
	Uncharacterized protein EEF1G	B4DTG2		6	14.58	3	100		4	9.45	3	99
	Uncharacterized protein EIF4G1	E9PGM1		35	27.56	5	100		39	32.72	5	100
	Uncharacterized protein FAM98B	A8MUW5		8	25.87	5	100		9	29.56	5	100
	Uncharacterized protein FARSA	B4E363		2	5.24	2	95		5	14.05	3	97
	Uncharacterized protein FXR1	E7ERF5		24	48.5	5	100		25	54.69	5	100
	Uncharacterized protein JUP	F5GWP8		13	22.34	5	95		10	15.23	5	90
	Uncharacterized protein MYO6	E7EW20		6	6.77	3	100		1	1.01	2	92
	Uncharacterized protein PRRC2A	F8VVM9		19	20.41	5	96		18	21.27	5	97
	Uncharacterized protein PRRC2A	C9JD87		28	18.61	5	100		31	22.15	5	100
	Uncharacterized protein R3HDM2	B5MCU0		10	14.65	5	100		13	17.88	5	100
	Uncharacterized protein RNF213	C9JCP4		3	0.63	3	99		5	0.95	4	98
	Uncharacterized protein OS=Homo sapiens GN=RPL10 PE=4 SV=1	F8W7C6		6	38.04	5	100		5	38.04	5	100
	Uncharacterized protein OS=Homo sapiens GN=SEC24C PE=4 SV=2	E7EP00		16	24	5	100		15	22.15	5	99
	UPF0568 protein C14orf166	Q9Y224		13	58.61	5	100		14	61.89	5	100
	UPF0760 protein C2orf29	Q9UKZ1		3	8.24	2	98		6	18.82	4	100
	Uveal autoantigen with coiled-coil domains and ankyrin repeats	Q9BZF9		14	11.3	5	100		11	8.26	4	100
	Vimentin	P08670		38	80.47	5	100		36	76.82	5	100
	WW domain-binding protein 2	Q969T9		8	38.7	5	100		8	38.7	5	100
	X-ray repair cross-complementing protein 5	P13010		19	40.57	5	100		17	31.69	5	100
	X-ray repair cross-complementing protein 6	P12956		22	48.77	5	100		23	47.13	5	100
	YTH domain family protein 1	Q9BYJ9		9	18.07	5	100		9	18.07	5	100
	YTH domain family protein 3	Q7Z739		11	22.05	5	100		12	23.42	5	100
	Zinc finger CCCH domain-containing protein 18	Q86VM9		3	3.99	3	99		4	6.09	5	100
	Zinc finger CCCH domain-containing protein 4	Q9UPT8		8	9.59	5	100		9	11.74	5	100
	Zinc finger CCCH domain-containing protein 7A	Q8IWR0		9	11.84	5	100		7	10.61	5	100
	Zinc finger CCCH-type antiviral protein 1	Q7Z2W4		11	17.96	5	100		11	17.41	5	100
	Zinc finger CCHC domain-containing protein 3	Q9NUD5		4	10.4	4	98		10	28.22	5	100
	Zinc finger FYVE domain-containing protein 9	O95405		5	3.86	3	100		5	3.51	3	100
	Zinc finger protein 787	Q6DD87		1	4.19	4	98		1	4.19	4	96
	Zinc finger protein ubi-d4	Q92785		6	23.53	5	100		10	31.46	5	100
	Zinc finger RNA-binding protein	Q96KR1		3	5.12	4	100		5	7.17	5	100
