# Supplementary material for: Resistance to Inhibitors of Cholinesterase 3 (Ric-3) Expression Promotes Selective Protein Associations with the Human α7-Nicotinic Acetylcholine Receptor Interactome
Source: PLoS One. 2015 Aug 10;10(8):e0134409. doi: 10.1371/journal.pone.0134409 (PMC4530945; doi:10.1371/journal.pone.0134409)
Supplement: S4 Table — GO terms for cellular localization of identified SH-EP1-hα7-Ric-3 unique (A) and SH-EP1-hα7 unique (B) proteins. A total of 82% of the 39 (32 total) SH-EP1-hα7-Ric-3 unique, Ric-3-mediated proteins and 83% of the 97 (82 total) SH-EP1-hα7 unique proteins have GO terms that identifies the cellular compartment where the proteins have been reported to be localized. Proteins are identified by Uniprot accession numbers. The number of proteins associated with each compartment is listed as “Protein count” and the proportion of proteins classified into each compartment are listed as a percent of the total attributed proteins. (XLSX) [file pone.0134409.s005.xlsx]

## Sheet: S4 Table
A	Attributed SH-EP1-hα7-Ric-3 specific α7-nAChR interacting proteins	GO Term Number	Go Term	Protein Count	Percent Total
	Q15678, Q9UEY8, P27105, Q96PE2, P21589, P27797, Q14643, Q9BX70, Q96CV9, P10644, Q8NFF5, P18085, P48643, Q13137, Q9UNL2, P27824, Q8WWI1, Q96D15, Q9UH99, Q86UE4, P62937, O60762, Q9UBS4, P02792, Q7Z3C6, Q9Y4L1	GO:0005737	Cytoplasm	27	69.2308
	Q15678, Q9UEY8, P27105, P27797, Q14643, Q96CV9, O95678, Q9NSB2, P18085, P48643, Q13137, Q9UNL2, Q13772, P27824, P19012, Q8WWI1, Q96D15, Q9UH99, Q86UE4, P62937, O60762, P02792, Q9UBS4, Q7Z3C6, Q9Y4L1	GO:0043229	Intracellular organelle	26	66.6667
	Q9UEY8, P27105, P27824, Q96PE2, Q96D15, P27797, Q9UH99, Q86UE4, Q14643, Q9BX70, Q96CV9, P10644, Q8NFF5, P62937, P18085, O60762, P48643, Q9UBS4, P02792, Q13137, Q9UNL2, Q7Z3C6, Q9Y4L1	GO:0044444	Cytoplasmic part	24	61.5385
	P27105, Q9UEY8, P19012, Q96D15, P27797, Q9UH99, Q86UE4, Q14643, O95678, Q9NSB2, O60762, P48643, P02792, Q9UBS4, Q9UNL2, Q9Y4L1	GO:0044446	Intracellular organelle part	16	41.0256
	Q15678, Q9NSB2, Q9UEY8, P27105, P19012, P48643, Q13137, Q9UH99, P02792, Q86UE4, Q14643, O95678	GO:0043232	Intracellular non-membrane-bounded organelle	13	33.3333
	P27105, P27824, O60762, Q96D15, P27797, Q9UBS4, Q9UNL2, Q86UE4, Q9Y4L1, Q14643	GO:0005783	Endoplasmic reticulum	10	25.641
	Q15678, Q9NSB2, Q9UEY8, P27105, P19012, Q13137, Q14643, O95678	GO:0005856	Cytoskeleton	9	23.0769
	O60762, Q96D15, P27797, Q9UBS4, Q9UNL2, Q9Y4L1, Q14643	GO:0044432	Endoplasmic reticulum part	7	17.9487
	P62937, Q8NFF5, Q96PE2, P48643, P27797, P02792, P10644	GO:0005829	Cytosol	7	17.9487
	P27105, P27824, Q7Z3C6, Q14643, Q96CV9	GO:0031410	Cytoplasmic vesicle	6	15.3846
	P27105, O60762, P21589, P27797, Q9UNL2, Q14643	GO:0005624	Membrane fraction	6	15.3846
	P27105, P27824, Q14643, Q96CV9	GO:0016023	Cytoplasmic membrane-bounded vesicle	5	12.8205
	Q96D15, P27797, Q9UBS4, Q9Y4L1	GO:0005788	Endoplasmic reticulum lumen	4	10.2564
	P27797, Q13137, Q86UE4, Q96CV9	GO:0048471	Perinuclear region of cytoplasm	4	10.2564
	Q9UH99, Q86UE4, Q14643	GO:0031965	Nuclear membrane	3	7.69231
	P27105, P27824	GO:0048770	Pigment granule	3	7.69231
	Q9NSB2, P19012, O95678	GO:0005882	Intermediate filament	3	7.69231
	Q9NSB2, P19012, O95678	GO:0045111	Intermediate filament cytoskeleton	3	7.69231
	Q9UEY8, Q8WWI1, Q86UE4	GO:0005911	Cell-cell junction	3	7.69231
	Q9UH99, Q86UE4, Q14643	GO:0005635	Nuclear envelope	3	7.69231
	P27797, Q9UNL2, Q14643	GO:0042598	Vesicular fraction	3	7.69231
	P27105, Q9UNL2	GO:0005791	Rough endoplasmic reticulum	2	5.12821
B	Attributed SH-EP1-hα7 specific α7-nAChR interacting proteins	GO Term Number	Go Term	Protein Count	Percent Total
	Q9ULM6, Q96EE3, P33316, Q9UPN6, Q13043, Q15528, Q5H9R7, Q13573, Q9NP81, Q9Y230, P0CAP2, Q8IY57, Q9BXF3, P36954, Q8IXQ6, P81877, O43294, Q5JTH9, O00629, Q9Y2X0, Q8IYB8, Q10570, P49756, Q9UHI6, P23258, P22087, O60244, Q6PIY7, Q15020, Q8TAT6, P20700, Q9NPA8, O95707, O15160, Q15459, P15407, P56537, P23368, Q8NDN9, Q9ULK4, Q9P086, Q86XI2, P42285, Q16706, P58107, Q9NQ29, Q96F44, Q6P2Q9, Q12816, Q9H6I2,…	GO:0043229	Intracellular organelle	64	67.3684
	Q9ULM6, Q96EE3, P33316, Q9UPN6, Q13043, Q15528, Q5H9R7, Q13573, Q9NP81, Q9Y230, P0CAP2, Q8IY57, Q9BXF3, P36954, Q8IXQ6, P81877, O43294, Q5JTH9, O00629, Q8IYB8, Q9Y2X0, Q10570, P49756, Q9UHI6, P23258, P22087, O60244, Q6PIY7, Q15020, Q8TAT6, P20700, Q9NPA8, O95707, O15160, Q15459, P15407, P56537, P23368, Q8NDN9, Q9ULK4, Q9P086, Q86XI2, P42285, Q16706, Q9NQ29, Q96F44, Q6P2Q9, Q12816, Q9H6I2, P07996,…	GO:0043231	Intracellular membrane-bounded organelle	63	66.3158
	Q9ULM6, Q96EE3, P33316, Q9UPN6, Q13043, Q15528, Q5H9R7, Q13573, Q9Y230, P0CAP2, Q8IY57, Q9BXF3, P36954, Q8IXQ6, P81877, O43294, Q5JTH9, O00629, Q8IYB8, Q9Y2X0, Q10570, P49756, Q9UHI6, P23258, P22087, O60244, Q6PIY7, Q15020, Q8TAT6, P20700, Q9NPA8, O95707, O15160, Q15459, P15407, P56537, Q8NDN9, Q9ULK4, Q9P086, Q86XI2, P42285, Q9NQ29, Q96F44, Q6P2Q9, Q12816, Q9H6I2, Q14980, Q9Y3C7, Q9NPJ6, Q9NR30,…	GO:0005634	Nucleus	56	58.9474
	Q96EE3, P23368, Q9ULK4, Q15528, Q13573, Q9NP81, Q9Y230, P0CAP2, Q9P086, P36954, P42285, Q16706, O43294, Q5JTH9, Q6P2Q9, P07996, Q14980, Q9Y3C7, O00629, Q9NPJ6, Q9Y2X0, Q9NRR4, Q8IYB8, Q9NR30, Q10570, P49756, Q9UHI6, P23258, O75448, P22087, O60244, Q5SRE5, Q6PIY7, Q9UBU9, Q96G25, Q15020, P12532, P20700, Q9NPA8, O00746, O95707, Q15459, O15160, P56537	GO:0044446	Intracellular organelle part	44	46.3158
	Q96EE3, Q9ULK4, Q15528, Q13573, P0CAP2, Q9Y230, Q9P086, P36954, P42285, O43294, Q5JTH9, Q6P2Q9, Q14980, Q9Y3C7, O00629, Q9NPJ6, Q9NRR4, Q9NR30, Q9Y2X0, Q10570, P49756, Q9UHI6, P23258, O75448, O60244, P22087, Q5SRE5, Q6PIY7, Q9UBU9, Q96G25, Q15020, P20700, Q9NPA8, O95707, Q15459, O15160, P56537	GO:0044428	Nuclear part	37	38.9474
	Table 3.3.2 Cellular compartment GO terms associated with identified proteins.
B	Attributed SH-EP1-hα7 specific α7-nAChR interacting proteins	GO Term Number	Go Term	Protein Count	Percent Total
	P23368, Q9ULK4, Q15528, Q13573, Q9NP81, Q9Y230, Q9P086, P36954, P42285, O43294, Q5JTH9, Q6P2Q9, Q14980, Q9Y3C7, Q9NPJ6, Q9NRR4, Q8IYB8, Q9NR30, Q9Y2X0, Q10570, P49756, Q9UHI6, O75448, O60244, P22087, Q9UBU9, Q96G25, Q15020, P20700, Q9NPA8, O95707, Q15459, O15160, P56537	GO:0070013	Intracellular organelle lumen	34	35.7895
	Q9ULK4, Q15528, Q13573, Q9Y230, Q9P086, P36954, P42285, O43294, Q5JTH9, Q6P2Q9, Q14980, Q9Y3C7, Q9NPJ6, Q9NRR4, Q9NR30, Q9Y2X0, Q10570, P49756, Q9UHI6, O75448, O60244, P22087, Q9UBU9, Q96G25, Q15020, P20700, Q9NPA8, O95707, Q15459, O15160, P56537	GO:0031981	Nuclear lumen	31	32.6316
	Q9Y2X0, Q9NPJ6, Q10570, Q9ULK4, Q15528, P49756, Q9UHI6, Q9Y230, Q9P086, O75448, O60244, P36954, Q15020, Q9UBU9, Q96G25, Q6P2Q9, Q9NPA8, O15160, Q14980, Q9Y3C7	GO:0005654	Nucleoplasm	20	21.0526
	Q9Y2X0, Q9NPJ6, Q10570, Q9ULK4, Q15528, P49756, Q9UHI6, Q9Y230, Q9P086, O75448, O60244, P36954, Q15020, Q9UBU9, Q96G25, Q6P2Q9, Q9NPA8, Q9Y3C7	GO:0044451	Nucleoplasm part	18	18.9474
	Q9NRR4, P42285, Q9NR30, Q9NPJ6, Q13573, Q5JTH9, O95707, O15160, Q15459, P56537, P22087	GO:0005730	Nucleolus	11	11.5789
	Q13064, P42285, P49756, Q86TB9, Q13573, Q9UHI6, Q6P2Q9, O95707, Q15459, P22087	GO:0030529	Ribonucleoprotein complex	10	10.5263
	Q5SRE5, O00629, Q96EE3, Q9UBU9, P12532, P20700, P0CAP2, O00746, P56537	GO:0031967	Organelle envelope	9	9.47368
	Q9Y2X0, Q96G25, Q9NPJ6, Q15528, Q9P086, O75448, Q9Y3C7, O60244	GO:0016592	Srb-mediator complex	8	8.42105
	Q5SRE5, O00629, Q96EE3, Q9UBU9, P20700, P0CAP2, P56537	GO:0005635	Nuclear envelope	7	7.36842
	P20700, O43294, Q9Y230, Q14980, P56537	GO:0034399	Nuclear periphery	5	5.26316
	P42285, Q13573, Q9UHI6, Q6P2Q9, Q15459	GO:0005681	Spliceosome	5	5.26316
	Q15020, Q9UBU9, P49756, Q9UHI6, Q6P2Q9	GO:0016604	Nuclear body	5	5.26316
	P20700, O43294, Q9Y230, Q14980	GO:0016363	Nuclear matrix	4	4.21053
	Q5SRE5, O00629, Q96EE3, Q9UBU9	GO:0005643	Nuclear pore	4	4.21053
	Q5SRE5, O00629, Q96EE3, Q9UBU9	GO:0046930	Pore complex	4	4.21053
	Q6PIY7, P36954, O15160	GO:0030880	RNA polymerase complex	3	3.15789
	O95707, O15160, P22087	GO:0044452	Nucleolar part	3	3.15789
	P20700, P56537	GO:0005638	Lamin filament	2	2.10526
	P20700, P56537	GO:0005652	Nuclear lamina	2	2.10526
	Q9NPJ6, Q15528	GO:0000119	Mediator complex	2	2.10526
